# Supplementary material for: Preparation of Ag/α-Al2O3 for ethylene epoxidation through thermal decomposition assisted by extract of Cinnamomum camphora
Source: Royal Society of Chemistry journal article supplement (doi:10.1039/c3ra42336k), 2013-01-01
Supplement: c3ra42336k.pdf [file c3ra42336k.pdf]

## Support Information

Preparation of Ag/ $\alpha$ -Al<sub>2</sub>O<sub>3</sub> for ethylene epoxidation through thermal decomposition assisted with extract of *Cinnamomum. Camphora*

Daohua Sun\*, Huixuan Wang, Genlei Zhang, Jiale Huang and Qingbiao Li\*

Department of Chemical and Biochemical Engineering, College of Chemistry and Chemical Engineering, Fujian Provincial Key Laboratory of Chemical Biology, Xiamen University, Xiamen, 361005, China

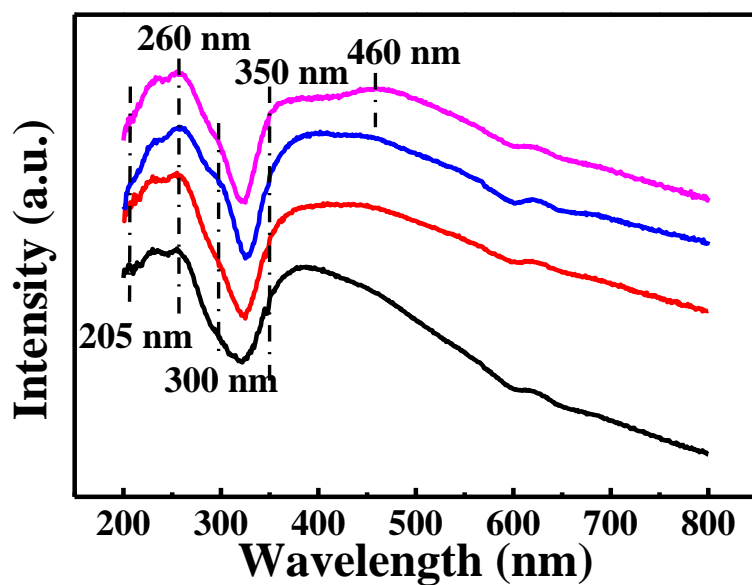

Fig. S1 UV-Vis DRS spectra of Ag/ $\alpha$ -Al<sub>2</sub>O<sub>3</sub> calcined at 600°C for different time.

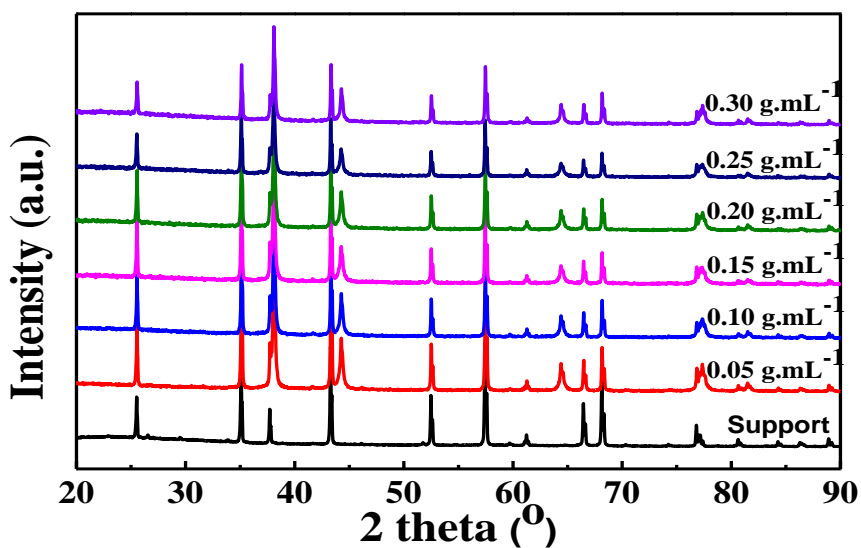

Fig. S2 XRD pattern of Ag/ $\alpha$ -Al<sub>2</sub>O<sub>3</sub> catalysts with different concentrations of *C. camphora* leaf extract

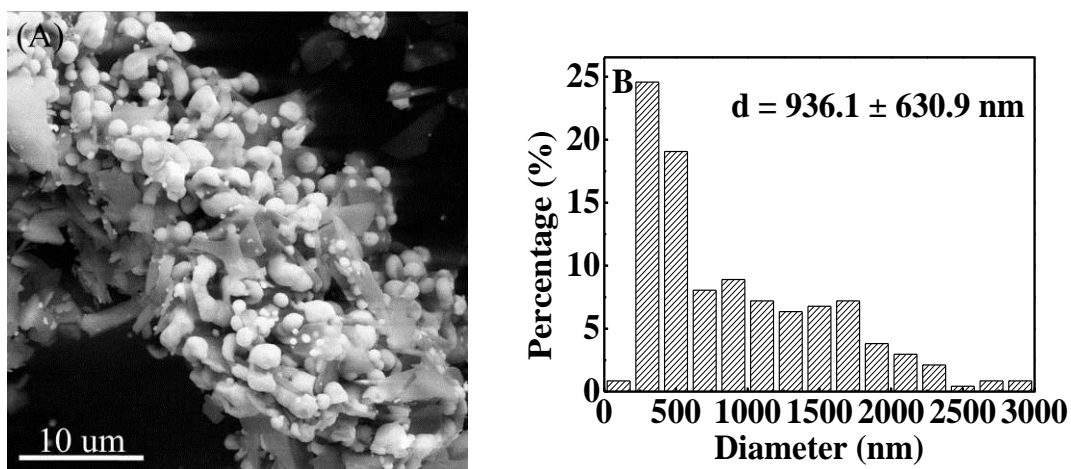

Fig S3 (A) SEM image and (B) the corresponding histogram of size distribution of Ag particles of Ag/ $\alpha$ -Al<sub>2</sub>O<sub>3</sub> catalysts prepared by thermal decomposition method
